# Supplementary material
Source: publisher site journal article supplement (https://www.dovepress.com/article/359498)
Supplement: Supplementary file 1 [file get_supplementary_file.php]

**
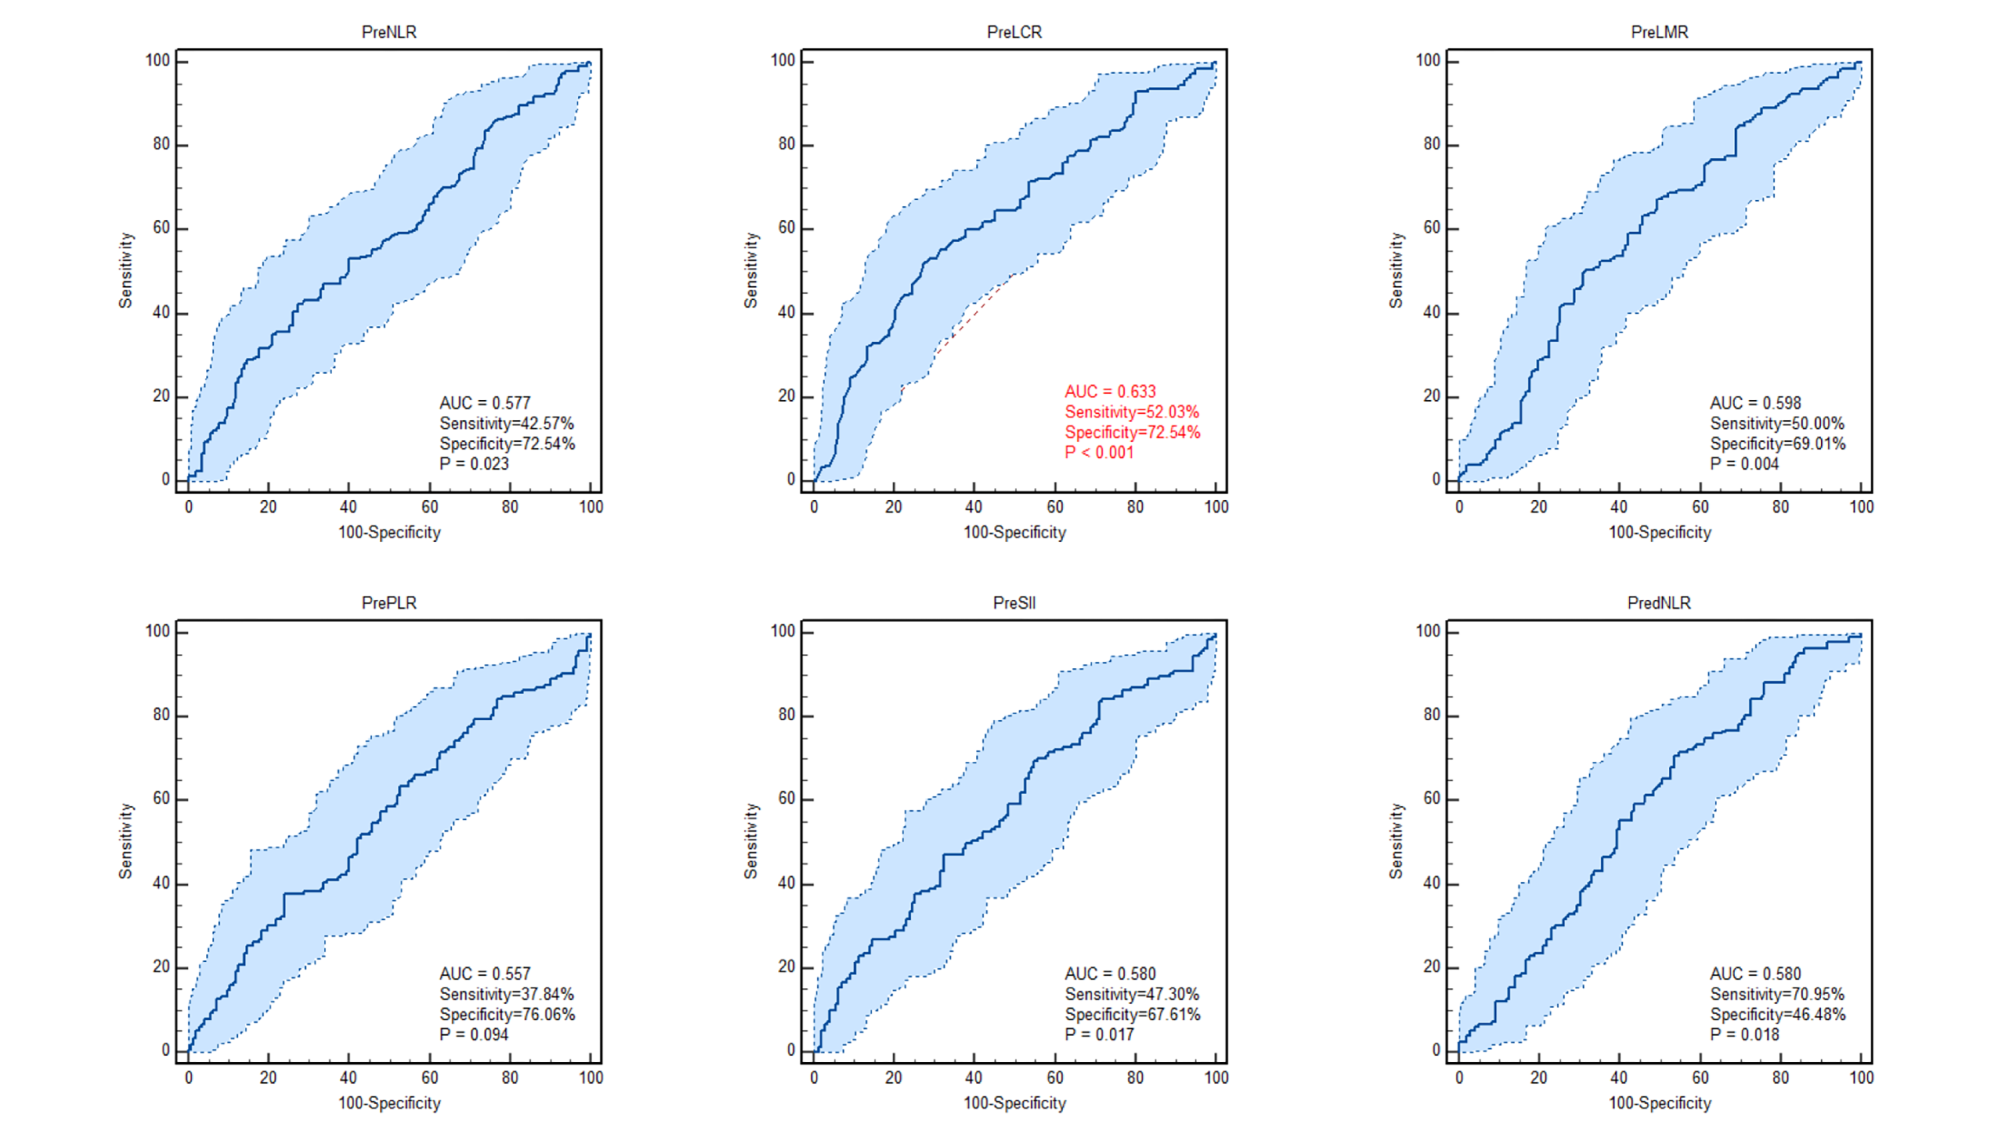
**

**Figure S1** Receiver operating characteristic curves of preoperative markers for overall survival in patients with hepatocellular carcinoma. PredNLR, preoperative derived neutrophil–lymphocyte ratio; PreLCR, preoperative lymphocyte–C-reactive protein ratio; PreLMR, preoperative lymphocyte–monocyte ratio; PreNLR, preoperative neutrophil–lymphocyte ratio; PrePLR, preoperative platelet–lymphocyte ratio; PreSII, preoperative systemic immune inflammation index.

The red font means the largest AUC among all 6 inflammation biomarkers.

**
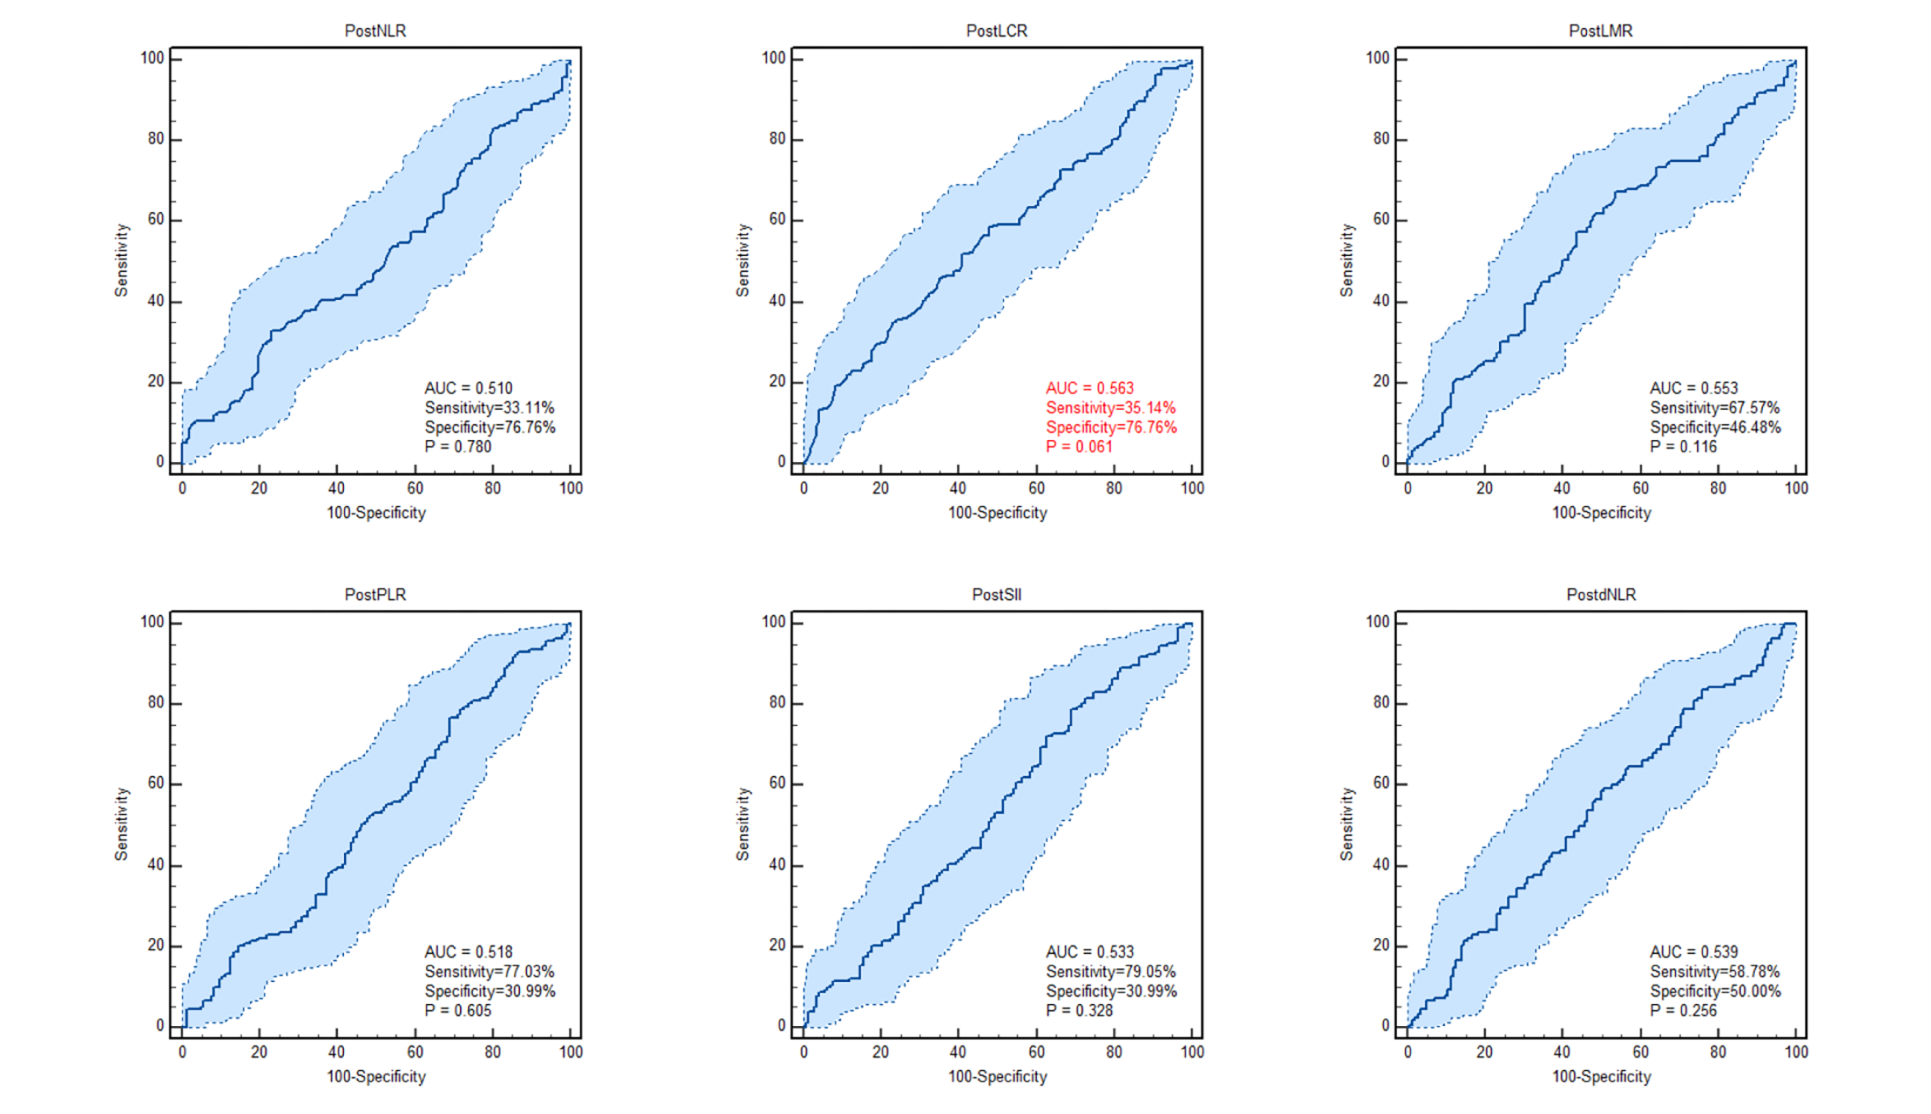
**

**Figure S2** Receiver operating characteristic curves of postoperative markers for overall survival in patients with hepatocellular carcinoma. PostdNLR, postoperative derived neutrophil–lymphocyte ratio; PostLCR, postoperative lymphocyte–C-reactive protein ratio; PostLMR, postoperative lymphocyte–monocyte ratio; PostNLR, postoperative neutrophil–lymphocyte ratio; PostPLR, postoperative platelet–lymphocyte ratio; PostSII, postoperative systemic immune inflammation index.

The red font means the largest AUC among all 6 inflammation biomarkers.


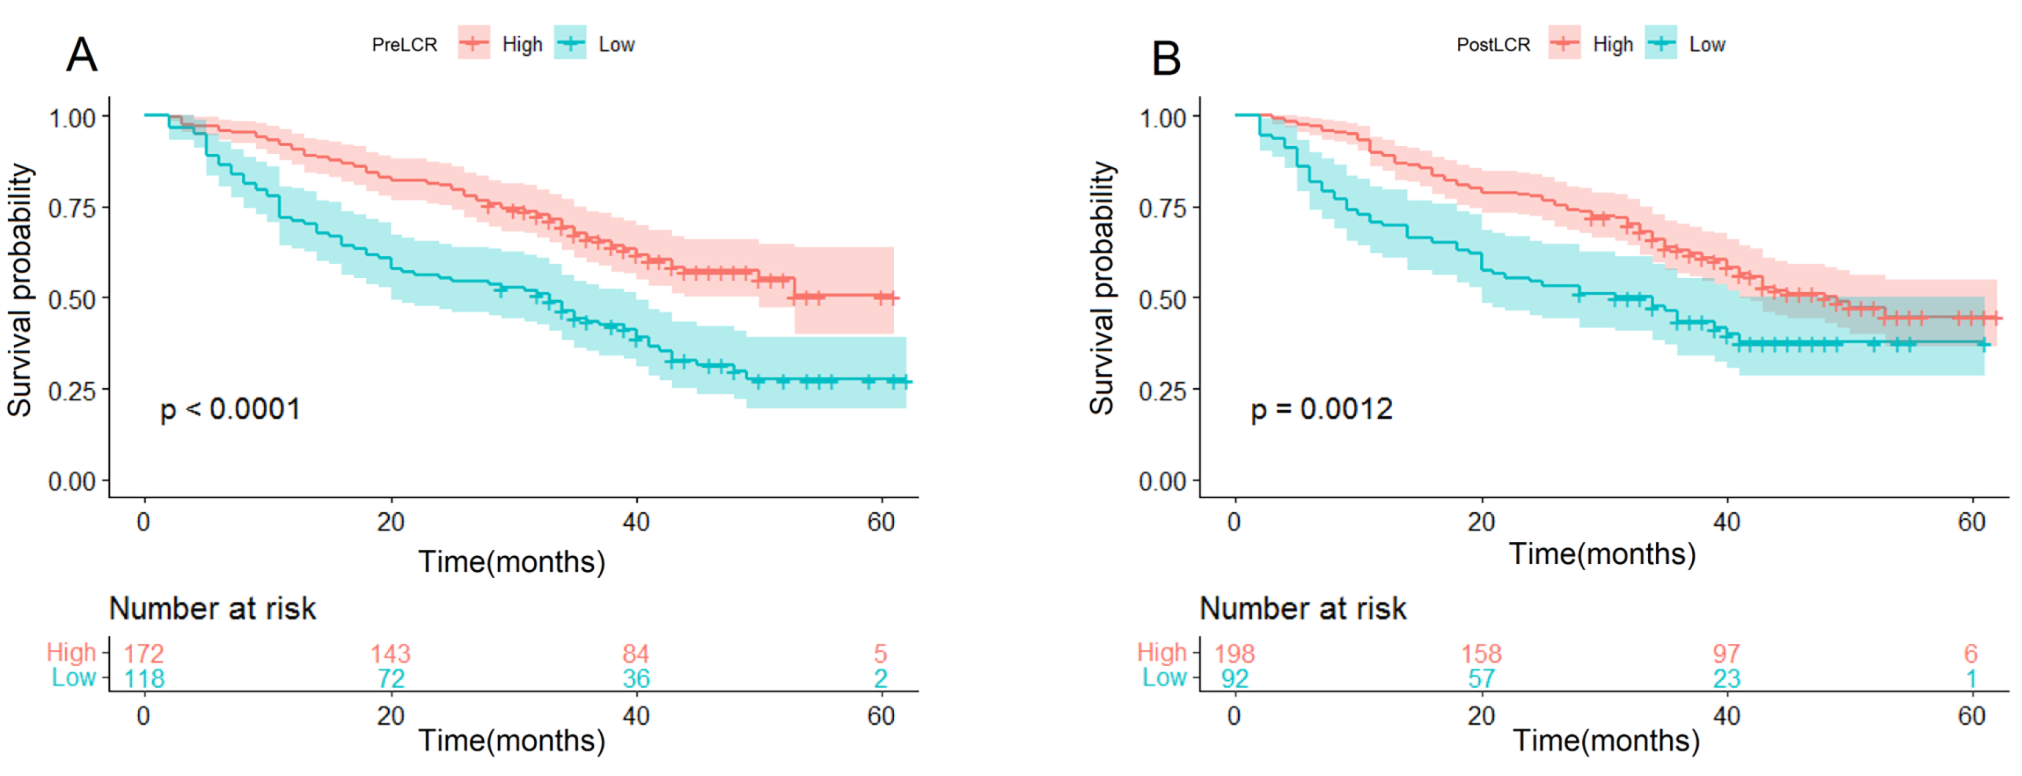


**Figure S3** Kaplan–Meier survival curves of overall survival in hepatocellular carcinoma patients based on (**A**) preoperative lymphocyte–C-reactive protein ratio (PreLCR) and (**B**) postoperative lymphocyte–C-reactive protein ratio (PostLCR).


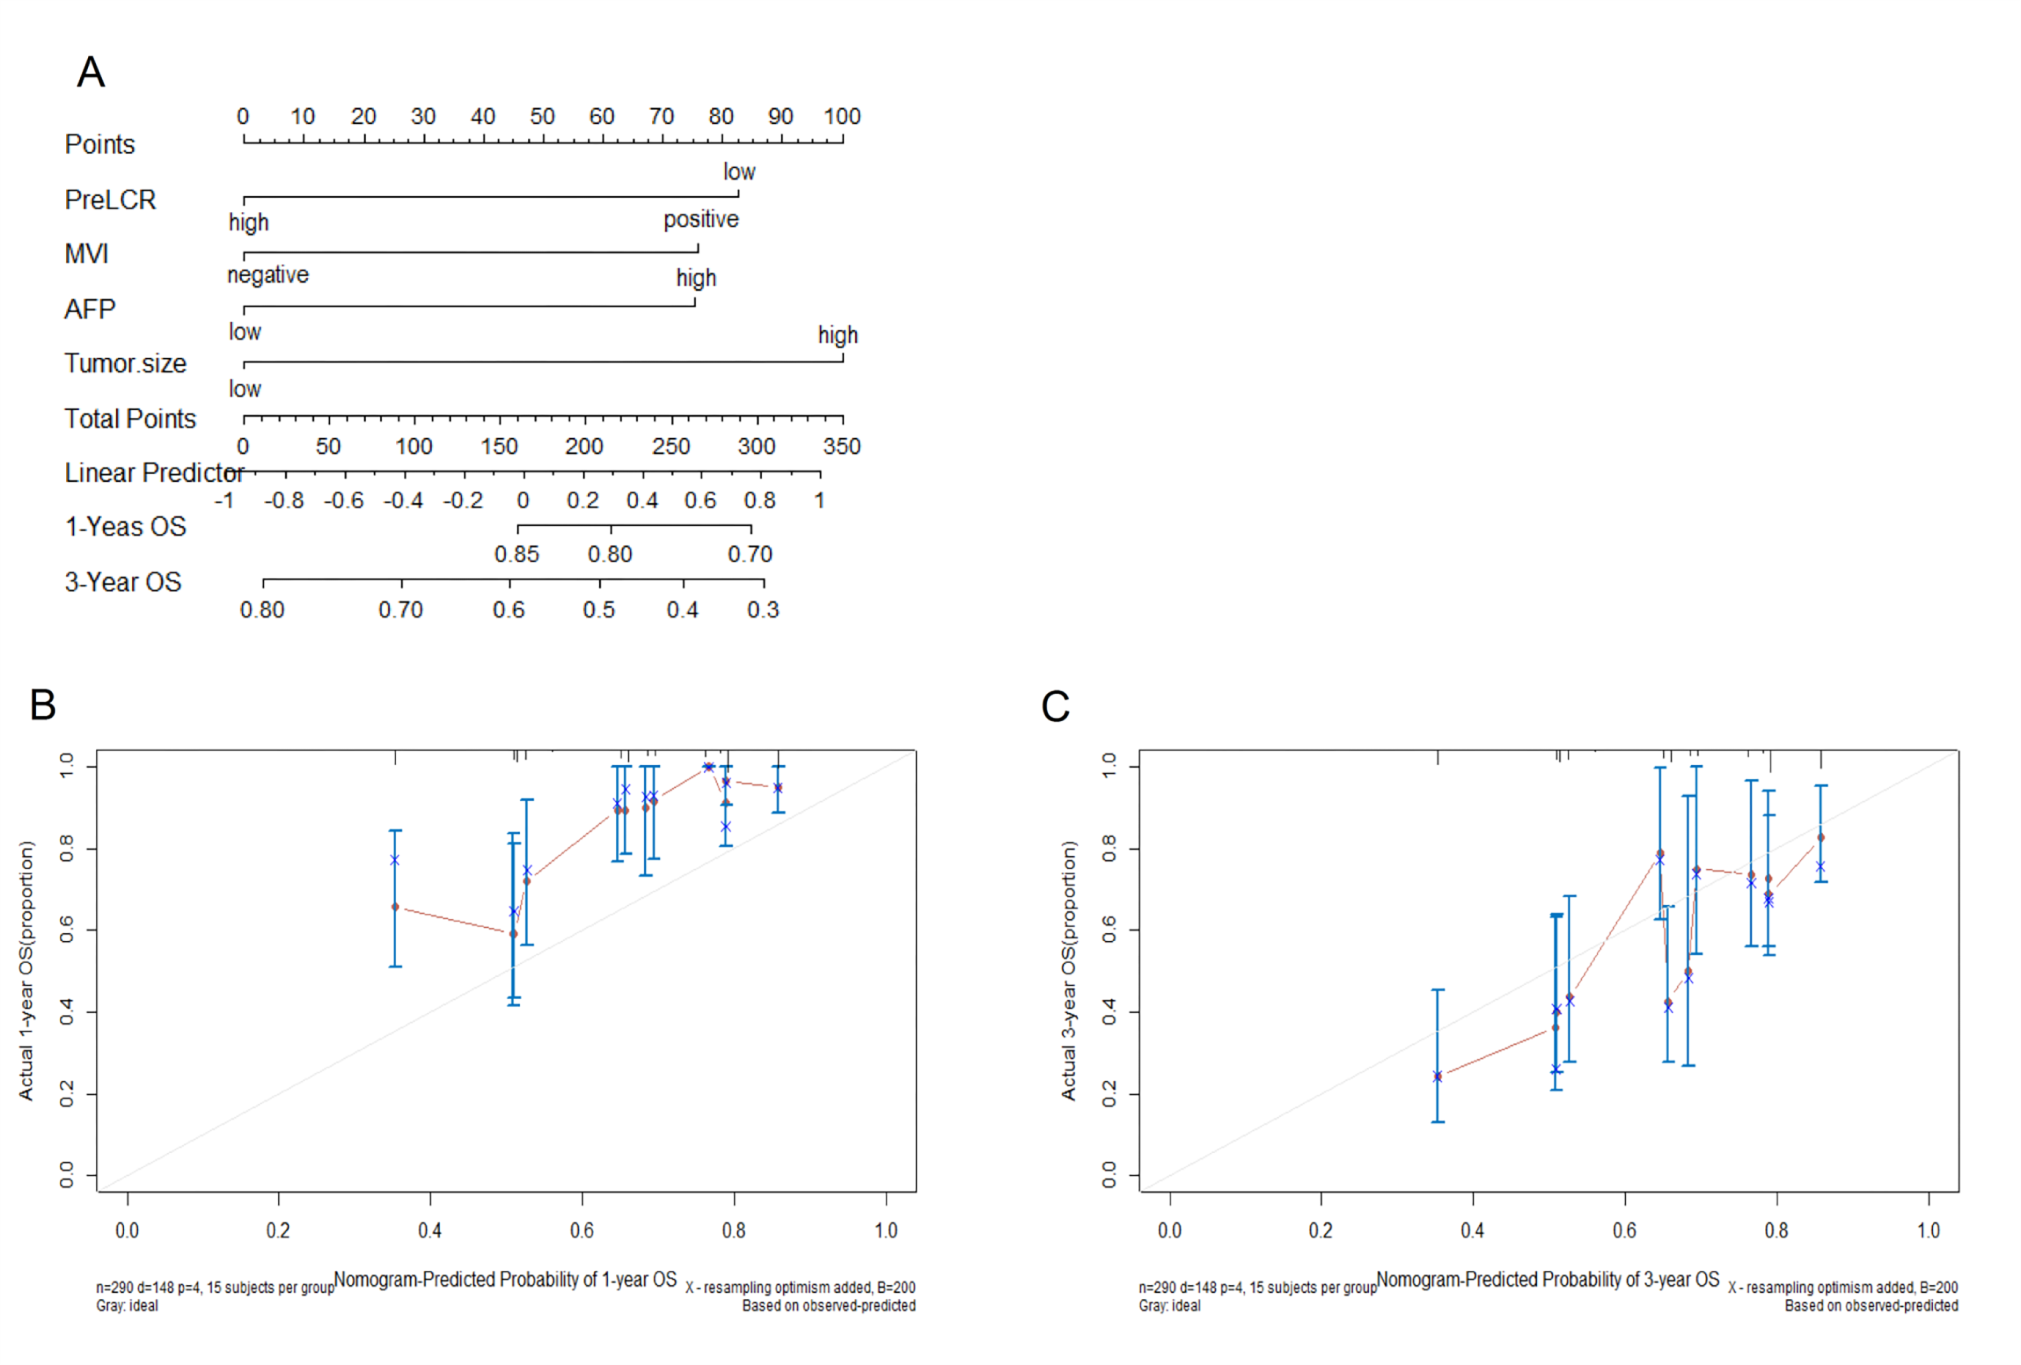


**Figure S4** Nomogram of the preoperative model for overall survival (OS) in patients with hepatocellular carcinoma(**A**). Calibration curves of the preoperative model for (**B**) 1-year and (**C**) 3-year overall survival (OS).AFP, alpha-fetoprotein; MVI, microvascular invasion; PreLCR, preoperative lymphocyte–C-reactive protein ratio.


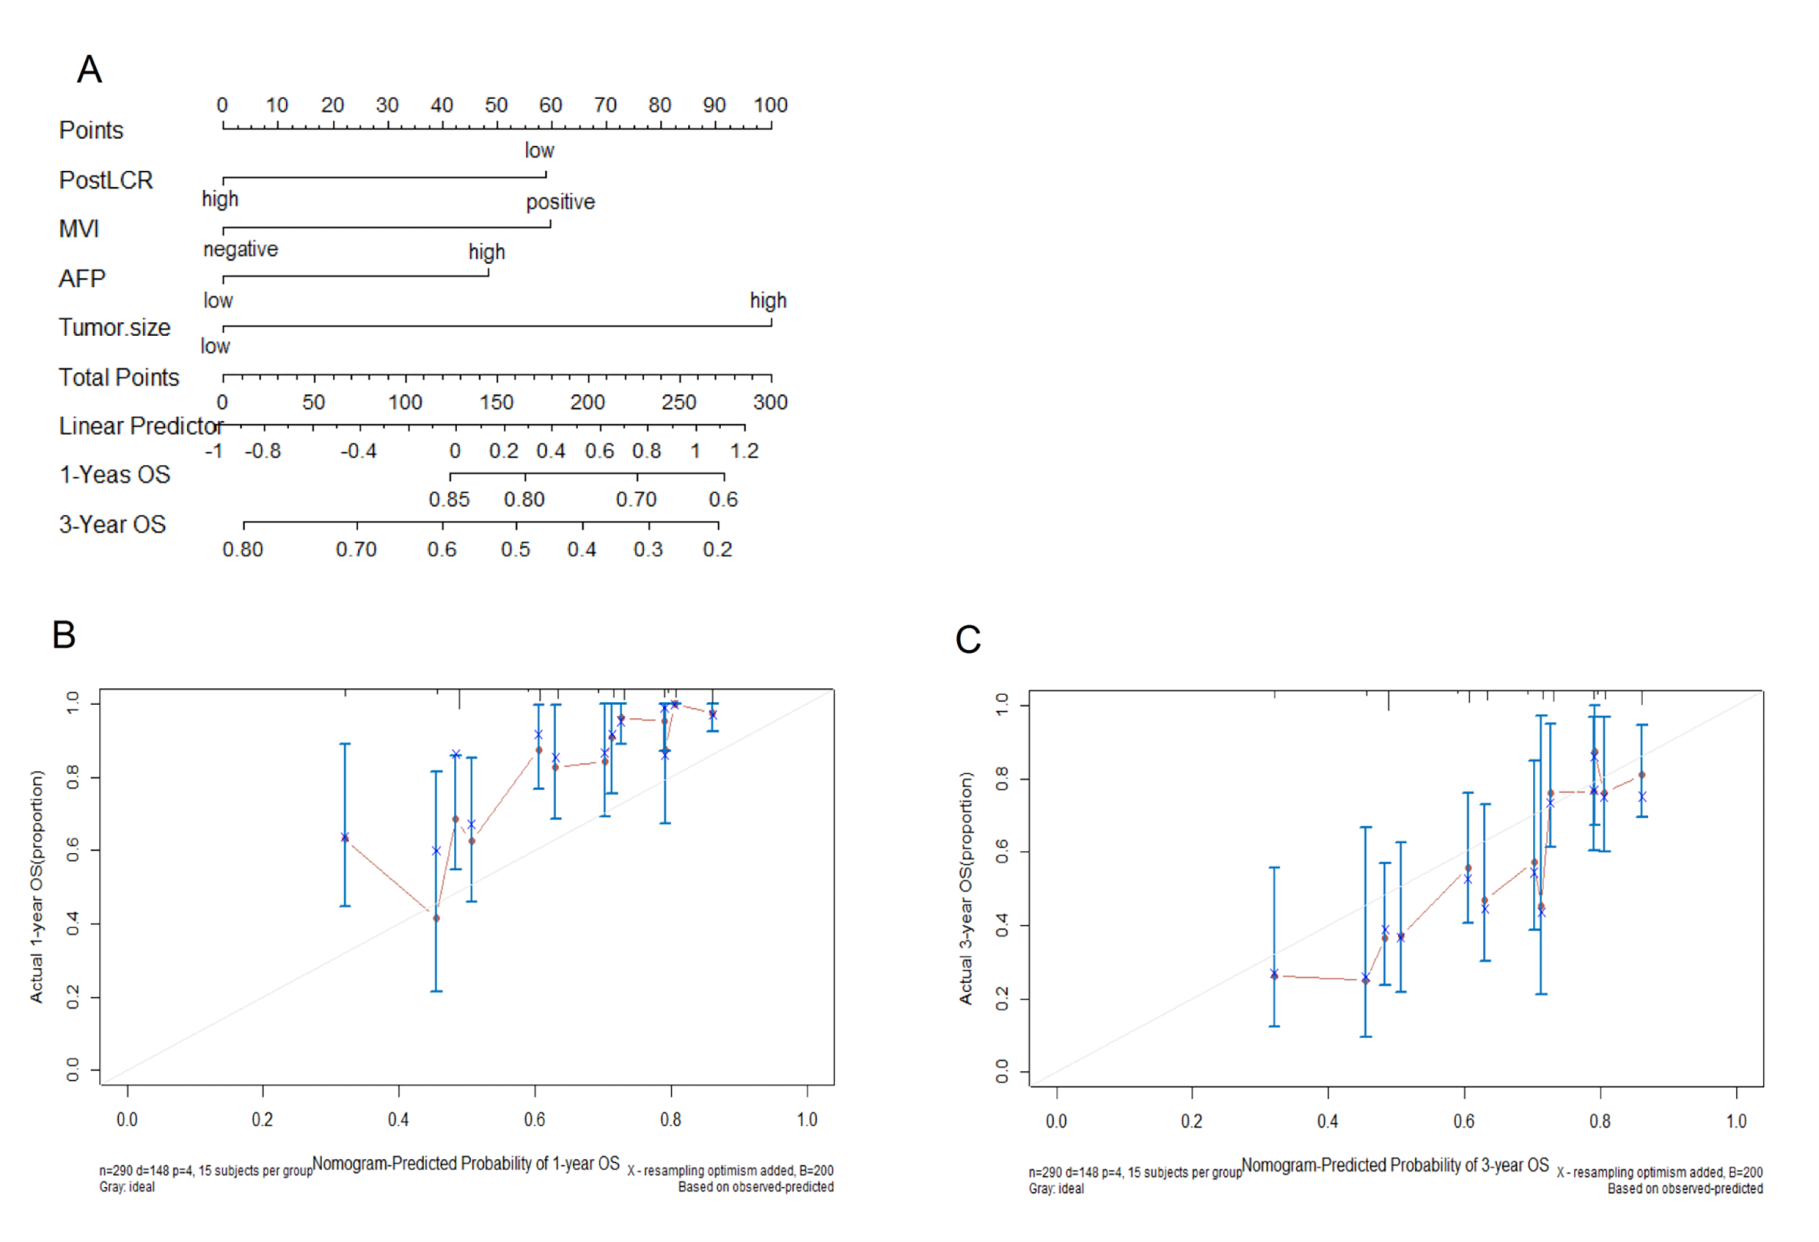


**Figure S5** Nomogram of the postoperative model for overall survival (OS) in patients with hepatocellular carcinoma(**A**). Calibration curves of the postoperative model for (**B**) 1-year and (**C**) 3-year overall survival (OS).AFP, alpha-fetoprotein; MVI, microvascular invasion; PostLCR, postoperative lymphocyte–C-reactive protein ratio.


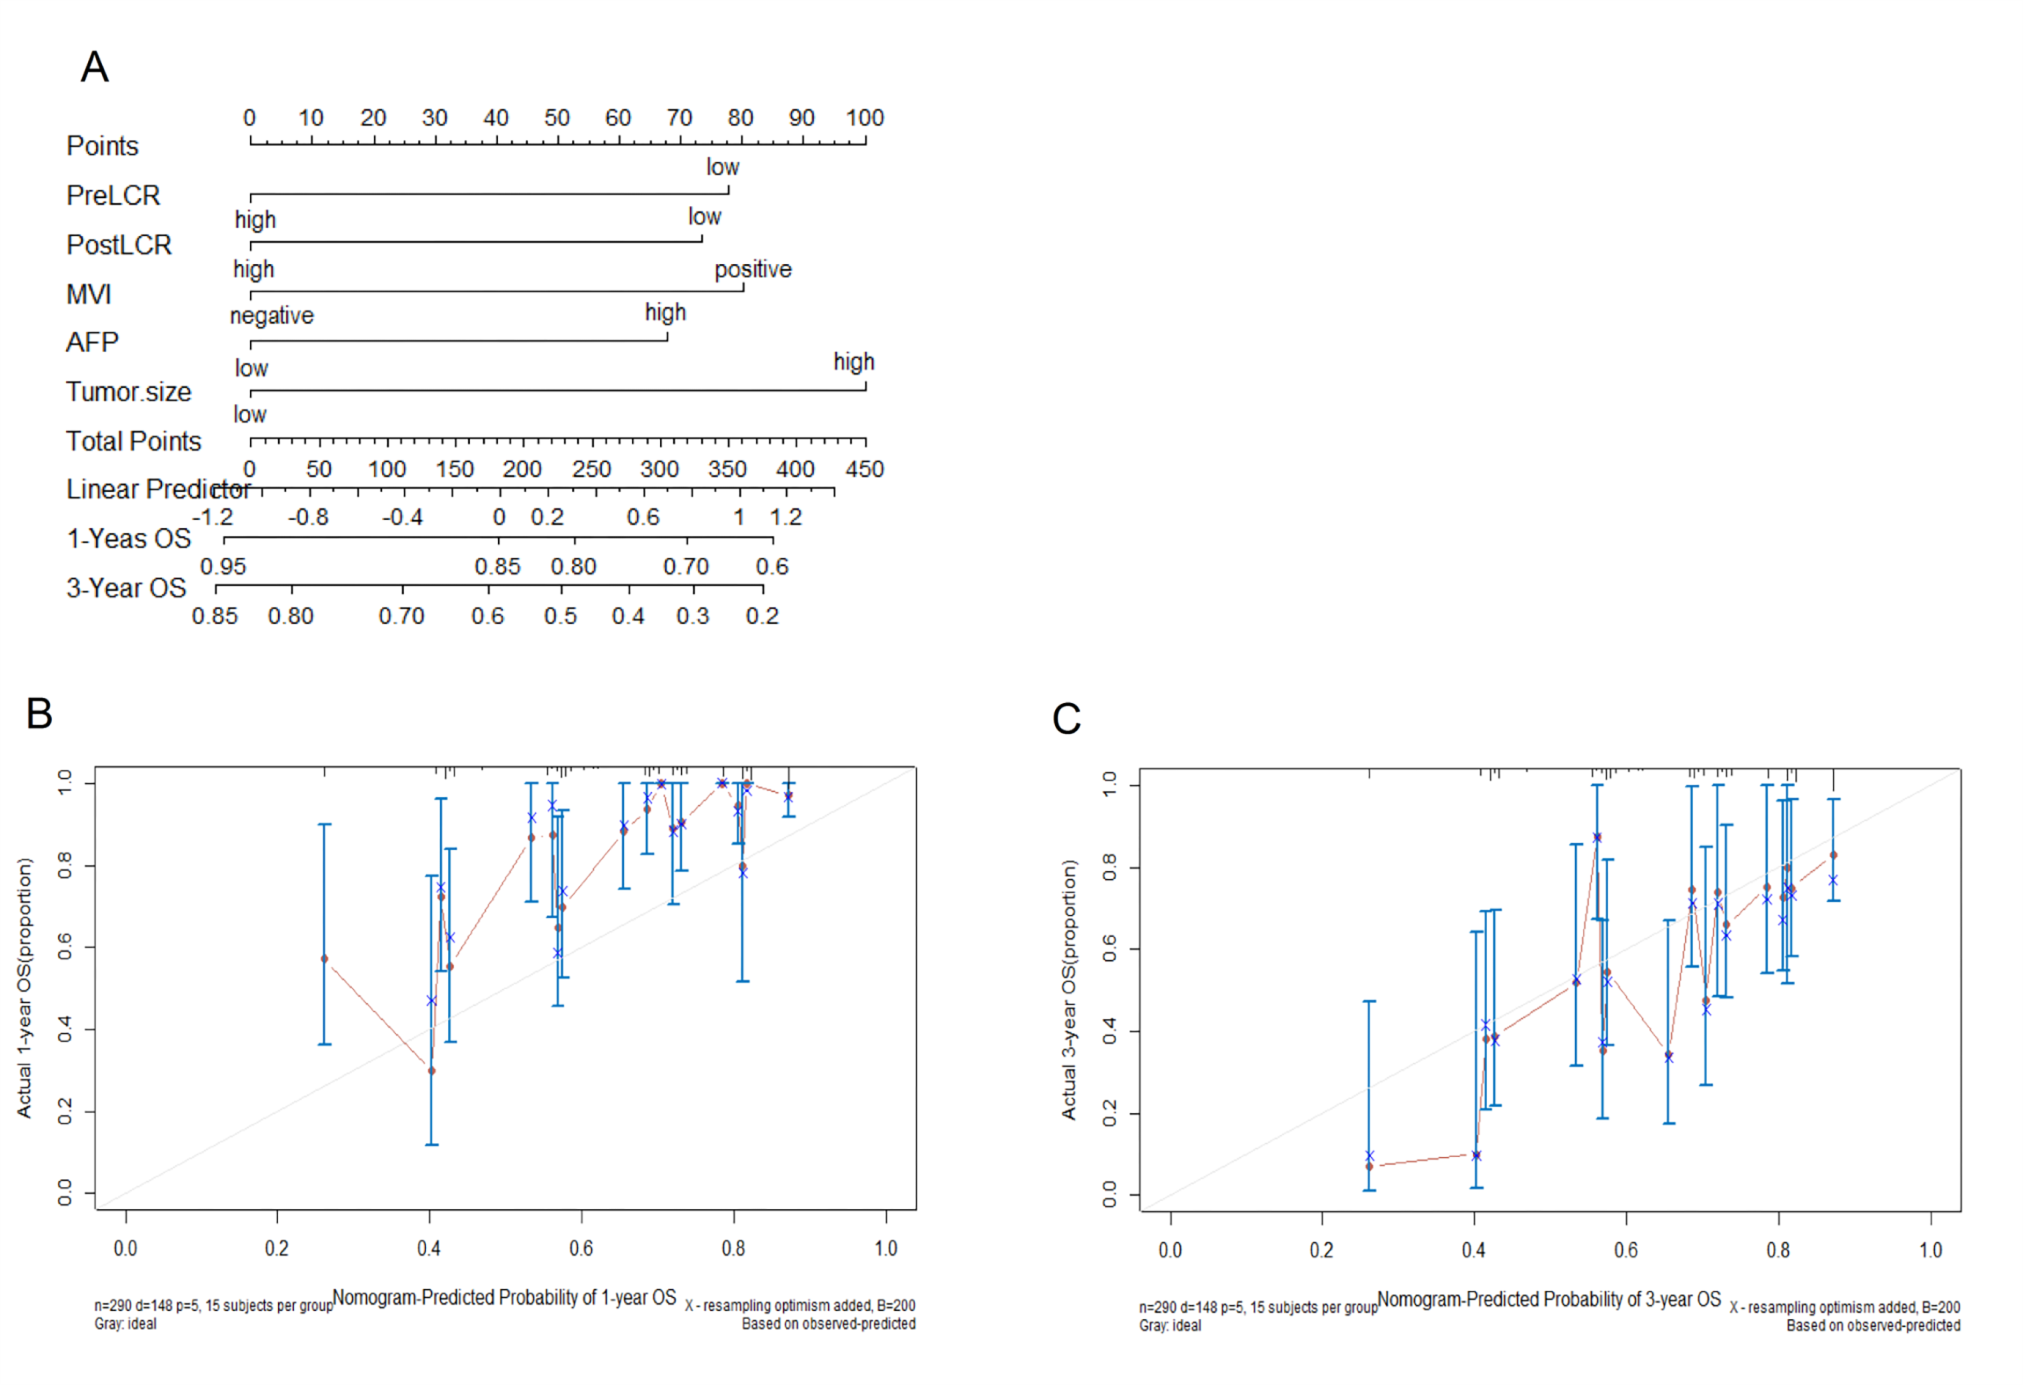


**Figure S6** Nomogram of the combined prognostic model for overall survival (OS) in patients with hepatocellular carcinoma(**A**). Calibration curves of the combined model for at (**B**) 1-year and (**C**) 3-year overall survival (OS).AFP, alpha-fetoprotein; MVI, microvascular invasion; PostLCR, postoperative lymphocyte–C-reactive protein ratio; PreLCR, preoperative lymphocyte–C-reactive protein ratio.


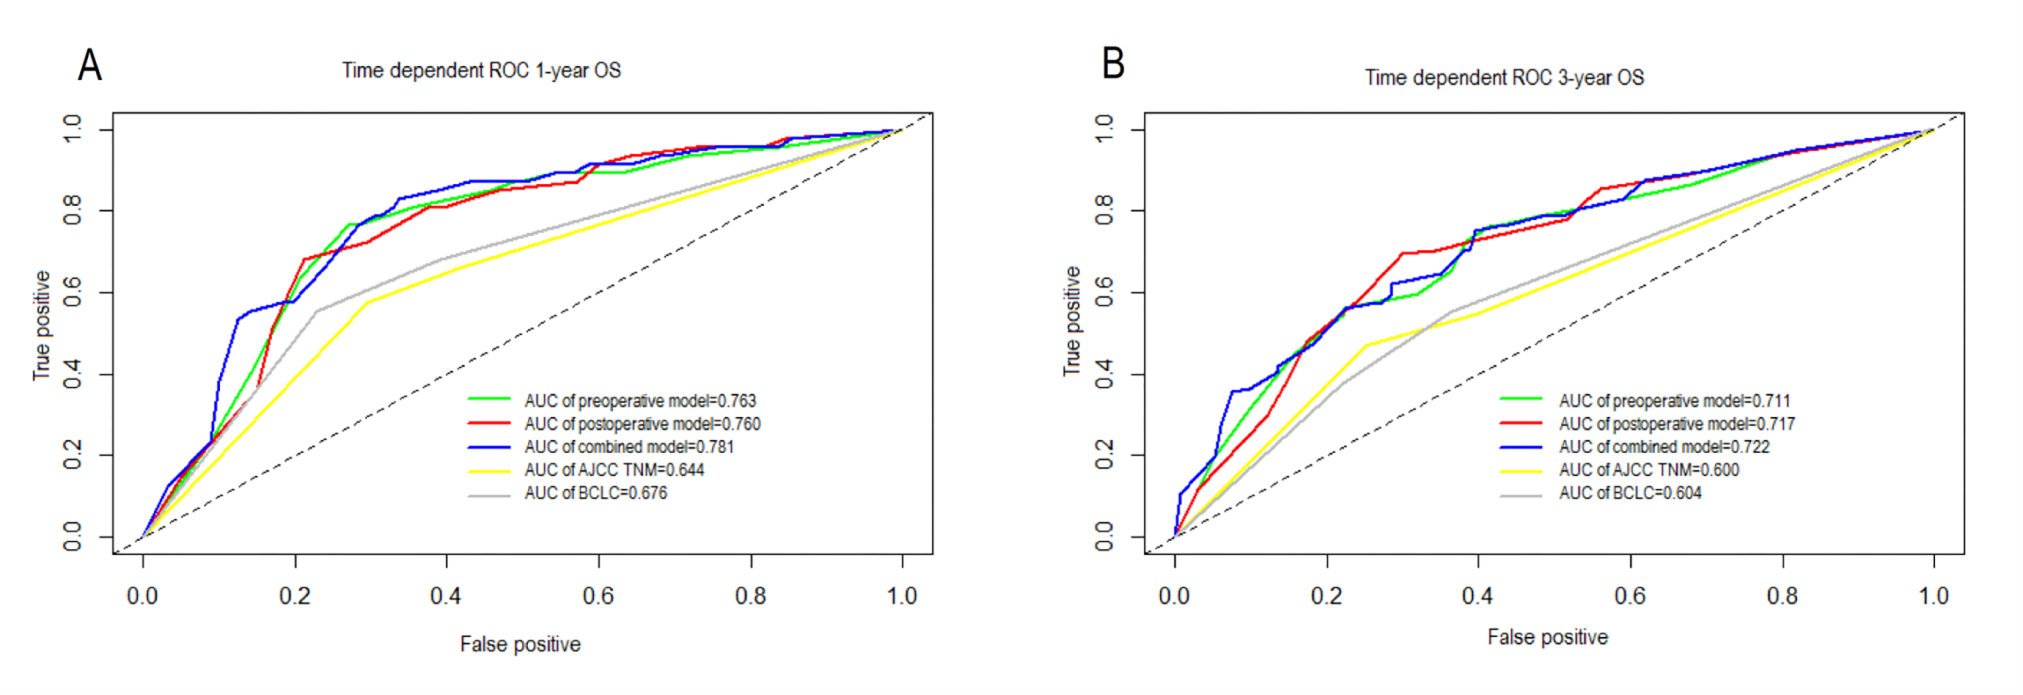


**Figure S7** Comparison of prognostic models and traditional clinical staging systems for overall survival (OS) prediction at (**A**) 1 year and (**B**) 3 years post-surgery. AJCC TNM, American Joint Committee on Cancer/Tumor-Node-Metastasis; AUC, area under the time-dependent receiver operating characteristic (ROC) curve; BCLC, Barcelona Clinic Liver Cancer.
